# Supplementary material
Source: PubMed Central journal article supplement (PMC3640422)
Supplement: NIHMS459356-supplement-1_si_001.pdf [file NIHMS459356-supplement-1_si_001.pdf]

## **Is macrocycle a synonym for kinetic inertness in Gd(III) complexes? Effect of coordinating and non-coordinating substituents on inertness and relaxivity of Gd(III) chelates with DO3A-like ligands.**

Miloslav Polasek and Peter Caravan\*

The Athinoula A. Martinos Center for Biomedical Imaging, Department of Radiology, Massachusetts General Hospital, Harvard Medical School, 149 Thirteenth Street, Suite 2301, Charlestown, MA 02129.

### **Content:**

|          |                                                                                                                                                                                                                                  |
|----------|----------------------------------------------------------------------------------------------------------------------------------------------------------------------------------------------------------------------------------|
| Page S2  | <b>Table S1.</b> Parameters obtained from fits of variable temperature $^{17}\text{O}$ transversal relaxivity measurements of water in presence of Gd chelates.                                                                  |
| Page S3  | <b>Figures S1.</b> LC-MS of <b>L1</b> , [Gd( <b>L1</b> )] and [Eu( <b>L1</b> )].                                                                                                                                                 |
| Page S4  | <b>Figures S2.</b> LC-MS of <b>L2</b> , [Gd( <b>L2</b> )] and [Eu( <b>L2</b> )].                                                                                                                                                 |
| Page S5  | <b>Figures S3.</b> LC-MS of <b>L3</b> , [Gd( <b>L3</b> )] and [Eu( <b>L3</b> )].                                                                                                                                                 |
| Page S6  | <b>Figures S4.</b> LC-MS of <b>L4</b> , [Gd( <b>L4</b> )] and [Eu( <b>L4</b> )].                                                                                                                                                 |
| Page S7  | <b>Figures S5.</b> LC-MS of <b>L5</b> , [Gd( <b>L5</b> )] and [Eu( <b>L5</b> )].                                                                                                                                                 |
| Page S8  | <b>Figures S6.</b> LC-MS of <b>L6</b> , [Gd( <b>L6</b> )] and [Eu( <b>L6</b> )].                                                                                                                                                 |
| Page S9  | <b>Figure S7.</b> Time-dependent luminescence of Eu complexes of ligands <b>L1 – L3</b> measured in $\text{H}_2\text{O}$ and $\text{D}_2\text{O}$ .                                                                              |
| Page S10 | <b>Figure S8.</b> Time-dependent luminescence of Eu complexes of ligands <b>L4</b> and <b>L5</b> measured in $\text{H}_2\text{O}$ and $\text{D}_2\text{O}$ .                                                                     |
| Page S11 | <b>Figure S9.</b> Relative change in relaxation rates of 1 mM solutions of [Gd( <b>L1</b> )], [Gd( <b>L2</b> )], [Gd( <b>L3</b> )] and [Gd(DO3A)] in 50 mM HEPES buffer pH = 7.4 as a function of added bicarbonate and lactate. |
| Page S12 | <b>Figure S10.</b> $^1\text{H}$ NMR spectrum of [Eu( <b>L1</b> )] in $\text{D}_2\text{O}$ at 25 °C.<br><b>Figure S11.</b> $^1\text{H}$ NMR spectrum of [Eu( <b>L2</b> )] in $\text{D}_2\text{O}$ at 25 °C.                       |
| Page S13 | <b>Figure S12.</b> $^1\text{H}$ NMR spectrum of [Eu( <b>L3</b> )] in $\text{D}_2\text{O}$ at 25 °C.                                                                                                                              |
| Page S14 | <b>Figure S13.</b> $^1\text{H}$ NMR spectrum of [Eu( <b>L4</b> )] in $\text{D}_2\text{O}$ at 25 °C.<br><b>Figure S14.</b> $^1\text{H}$ NMR spectrum of [Eu( <b>L5</b> )] in $\text{D}_2\text{O}$ at 25 °C.                       |
| Page S15 | <b>List of HPLC methods.</b>                                                                                                                                                                                                     |

**Table S1.** Parameters obtained from fits of variable temperature  $^{17}\text{O}$  transverse relaxivity measurements of water in presence of Gd chelates. Data was fit to a 4-parameter model as described previously (Caravan et al. *Inorg. Chem.* **2007**, *46*, 6632-6639). The  $^{17}\text{O}$  hyperfine coupling constant was assumed to be  $3.8 \times 10^6$  rad/s (Powell et al. *J. Am. Chem. Soc.* **1996**, *118*, 9333-9346).

| <b>Compound</b>                     | $\tau_M^{310}$ [ns] | $T_{1e}^{310}$ [ns] | $\Delta H^\ddagger$ [kJ] | $E_v$ [kJ]   |
|-------------------------------------|---------------------|---------------------|--------------------------|--------------|
| [Gd( <b>L1</b> )(H <sub>2</sub> O)] | 2190 ± 170          | 117 ± 110           | 34.1 ± 1.9               | -13.3 ± 13.6 |
| [Gd( <b>L2</b> )(H <sub>2</sub> O)] | 3500 ± 90           | ND                  | 30.5 ± 0.9               | ND           |
| [Gd( <b>L3</b> )(H <sub>2</sub> O)] | 12.7 ± 3.8          | 90 ± 180            | 27.7 ± 4.3               | 5.8 ± 33.4   |

ND = not determined. Water exchange was in the slow exchange region over the temperature range studied, i.e.  $T_{1e}$  did not contribute to the O-17  $T_2$ . The data were fit to a 2 parameter model ( $\tau_M^{310}$  and  $\Delta H^\ddagger$ ).

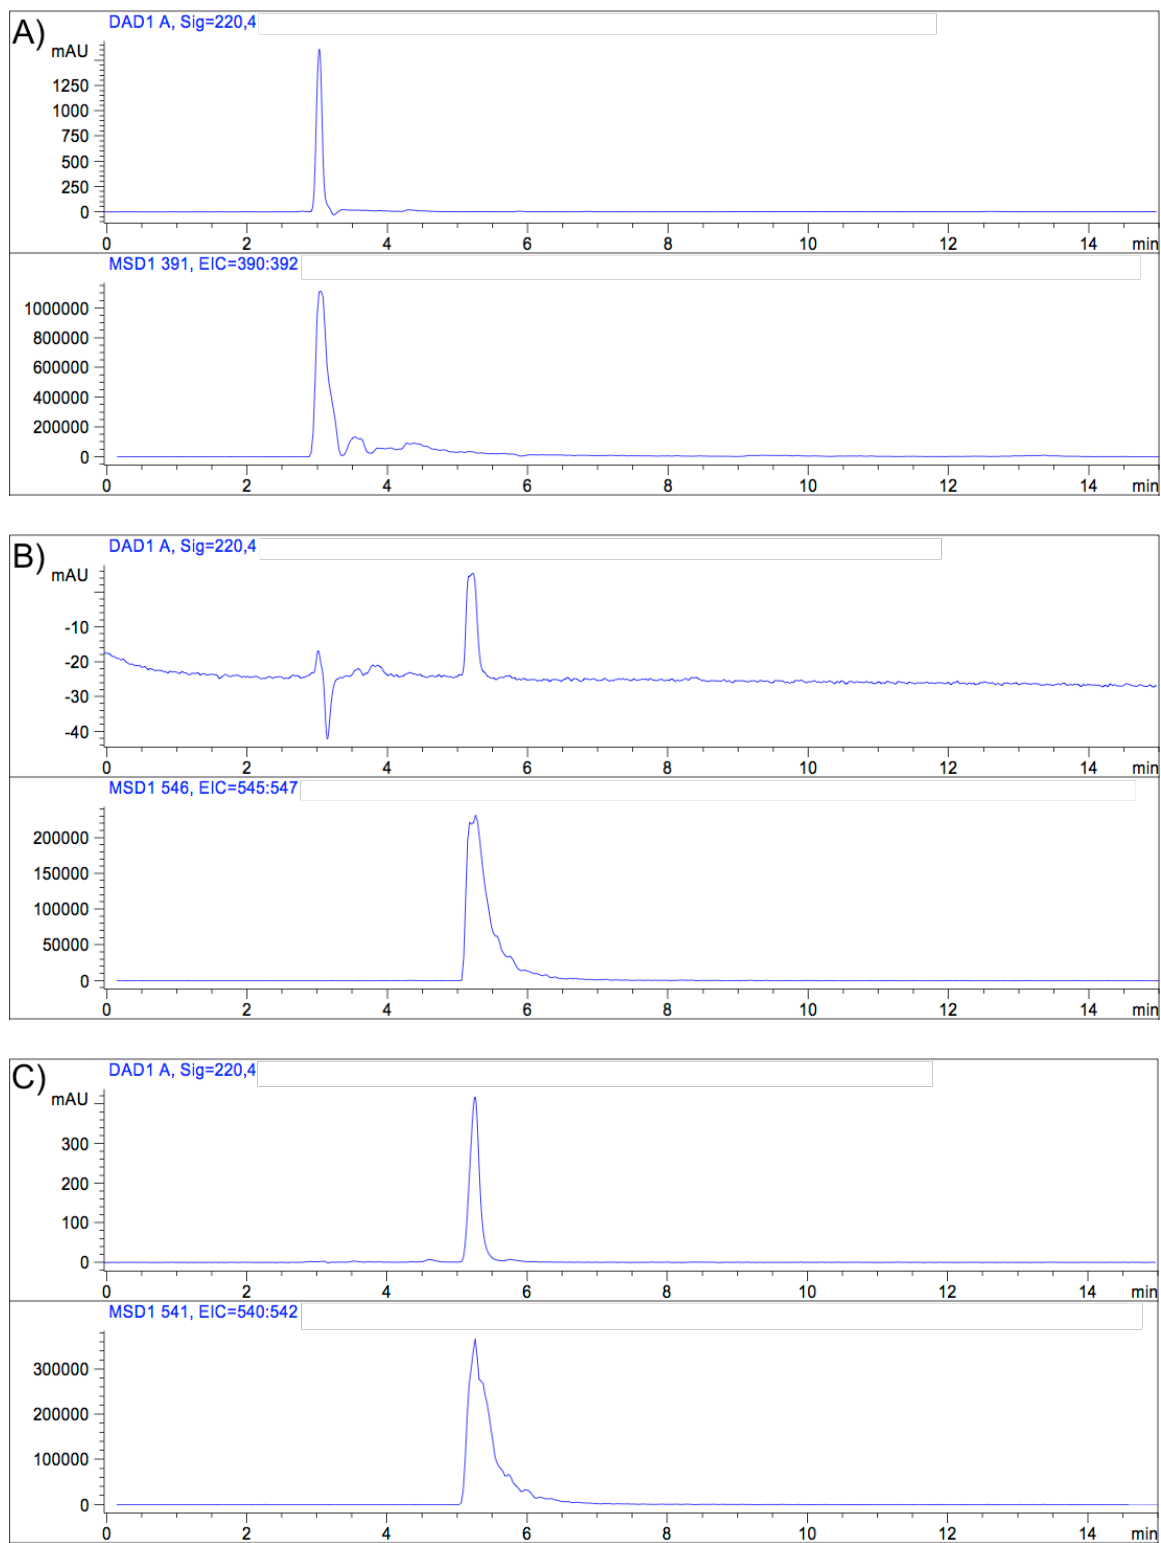

**Figure S1.** LC-MS chromatograms showing UV absorbance (220 nm) and extracted masses for  $[M+H]^+$  ions.

A) ligand **L1**, analytical method G.

B) chelate  $[Gd(L1)]$ , analytical method G.

C) chelate  $[Eu(L1)]$ , analytical method G.

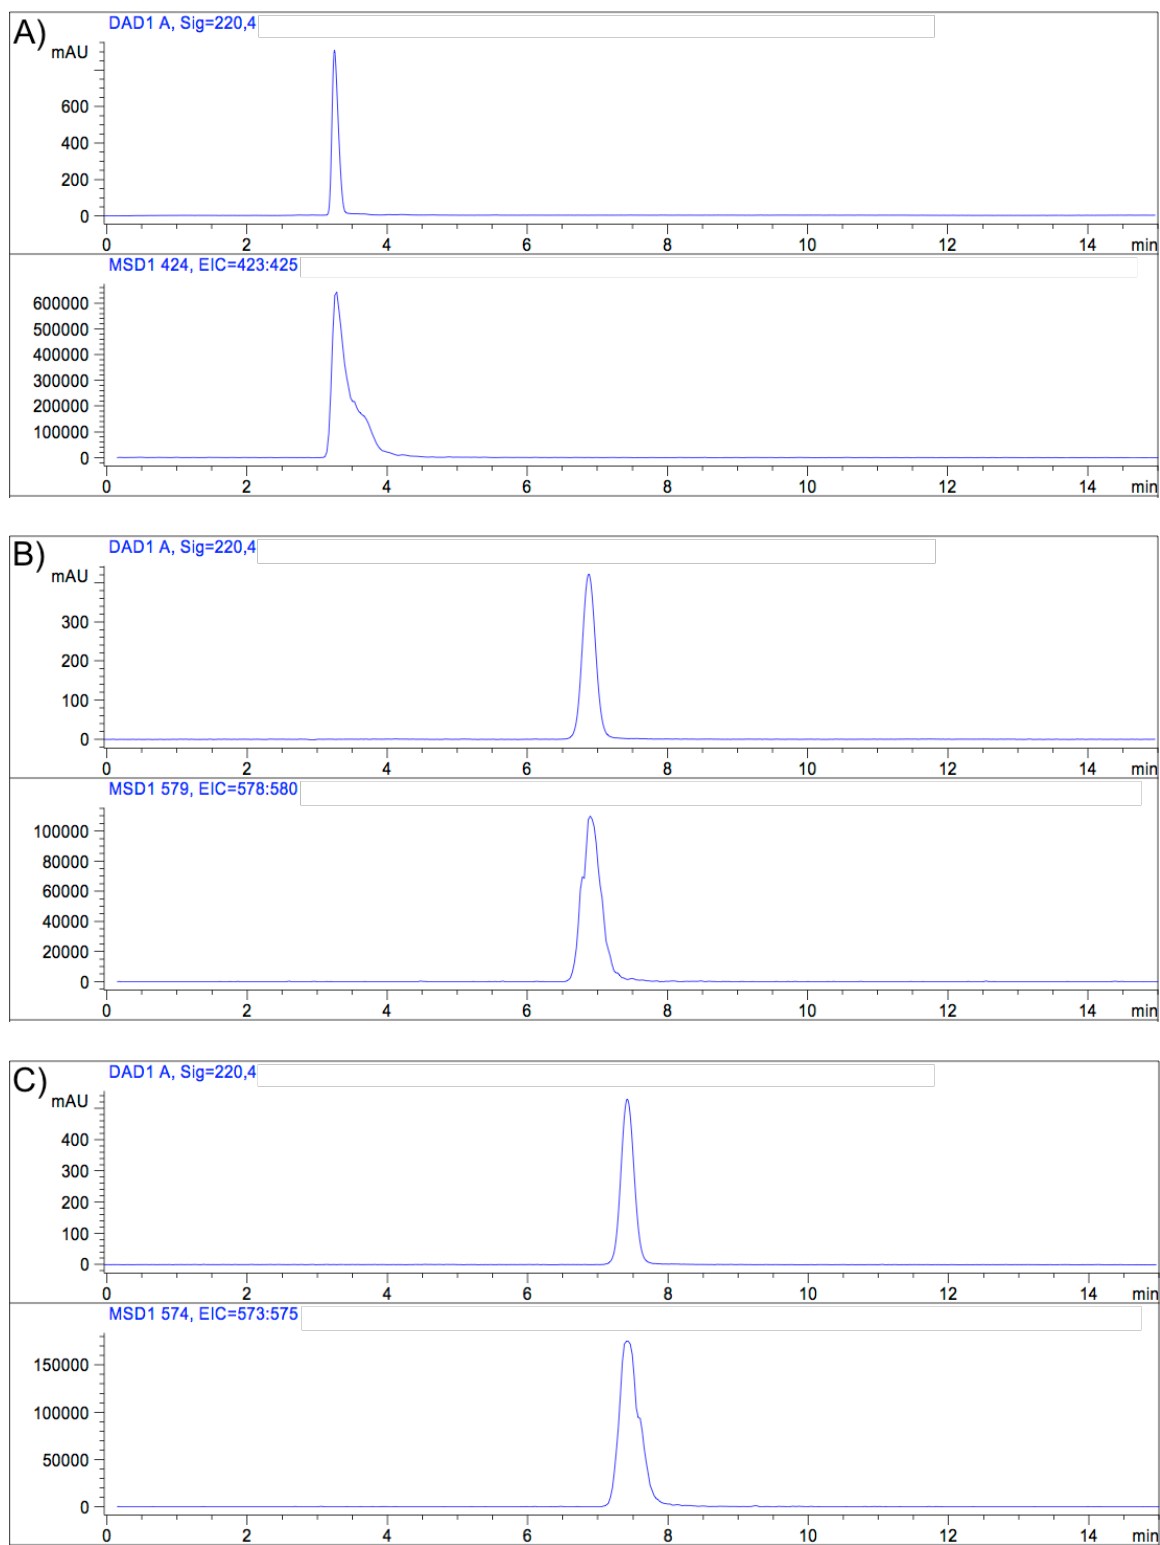

**Figure S2.** LC-MS chromatograms showing UV absorbance (220 nm) and extracted masses for  $[M+H]^+$  ions.

A) ligand **L2**, analytical method G.

B) chelate  $[Gd(L2)]$ , analytical method G.

C) chelate  $[Eu(L2)]$ , analytical method G.

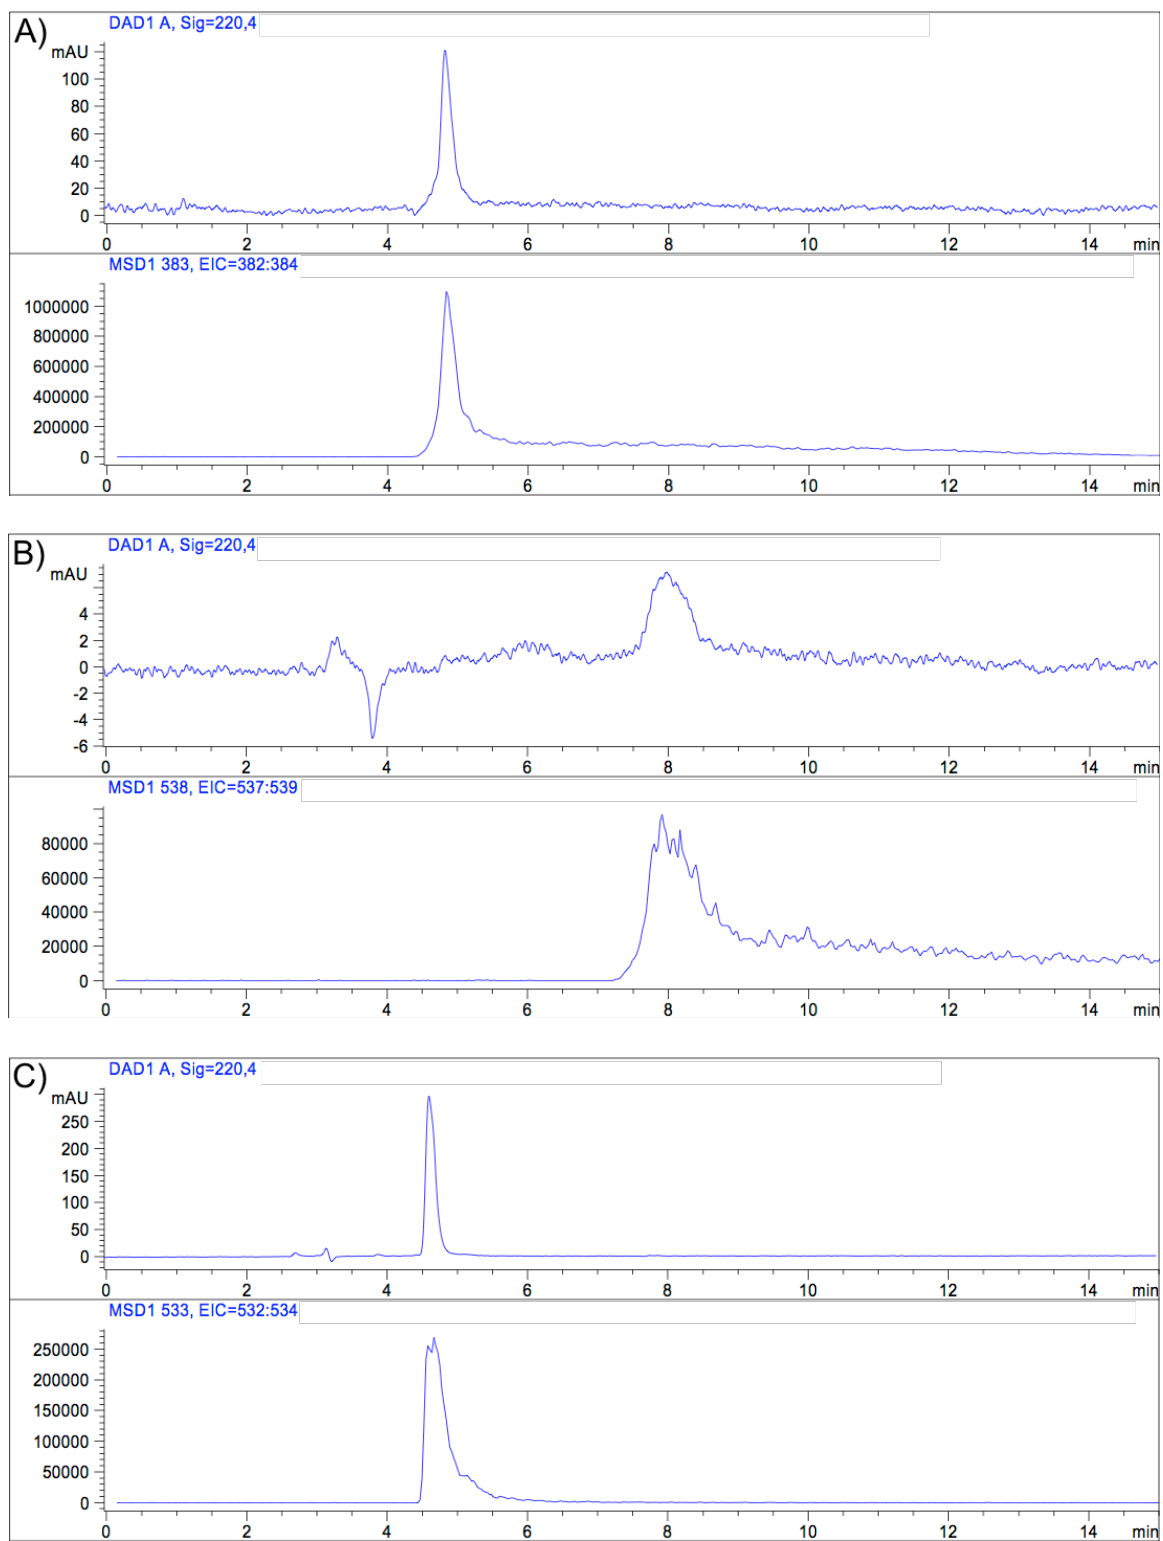

**Figure S3.** LC-MS chromatograms showing UV absorbance (220 nm) and extracted masses for  $[M+H]^+$  ions.

A) ligand **L3**, analytical method H.

B) chelate  $[Gd(\mathbf{L3})]$ , analytical method I.

C) chelate  $[Eu(\mathbf{L3})]$ , analytical method G.

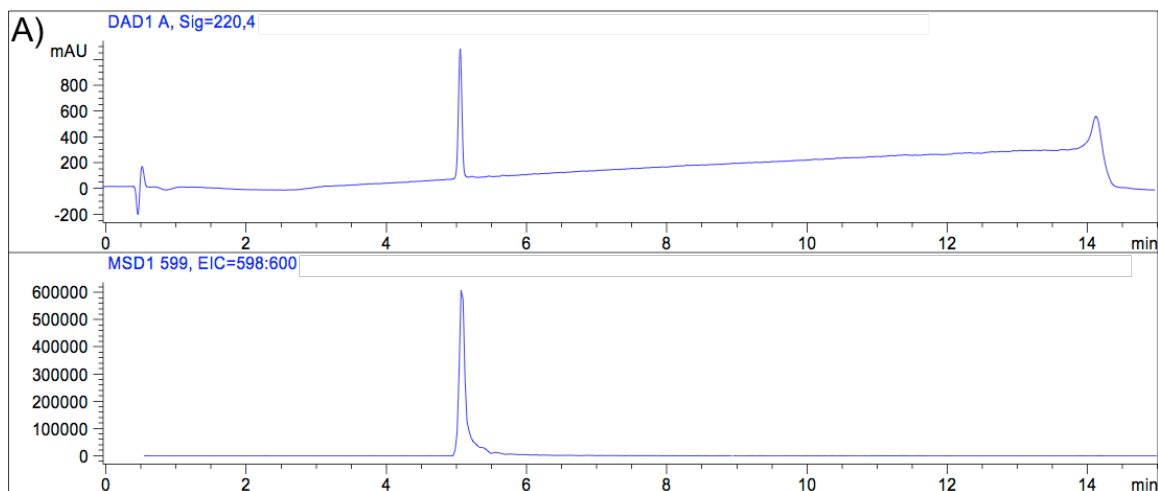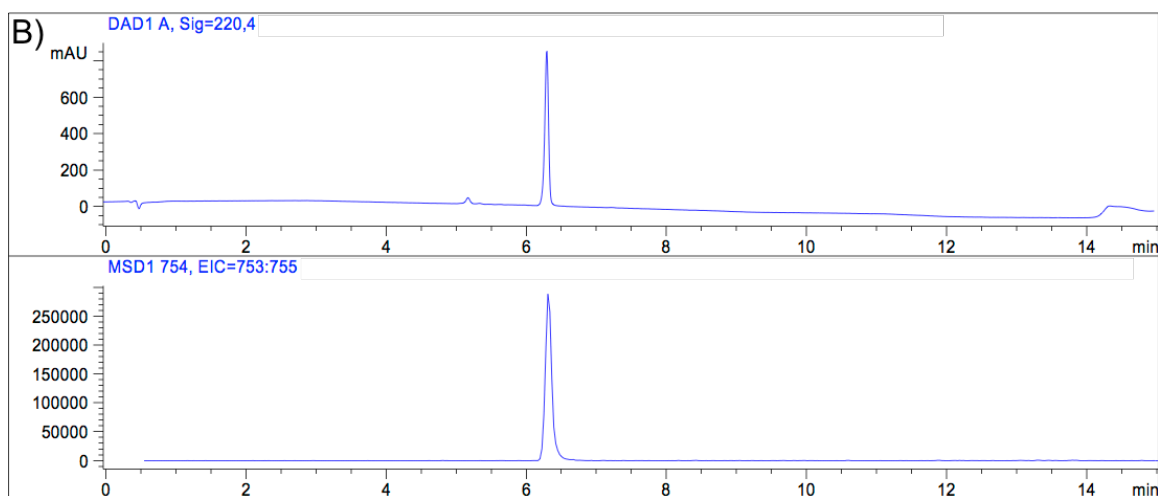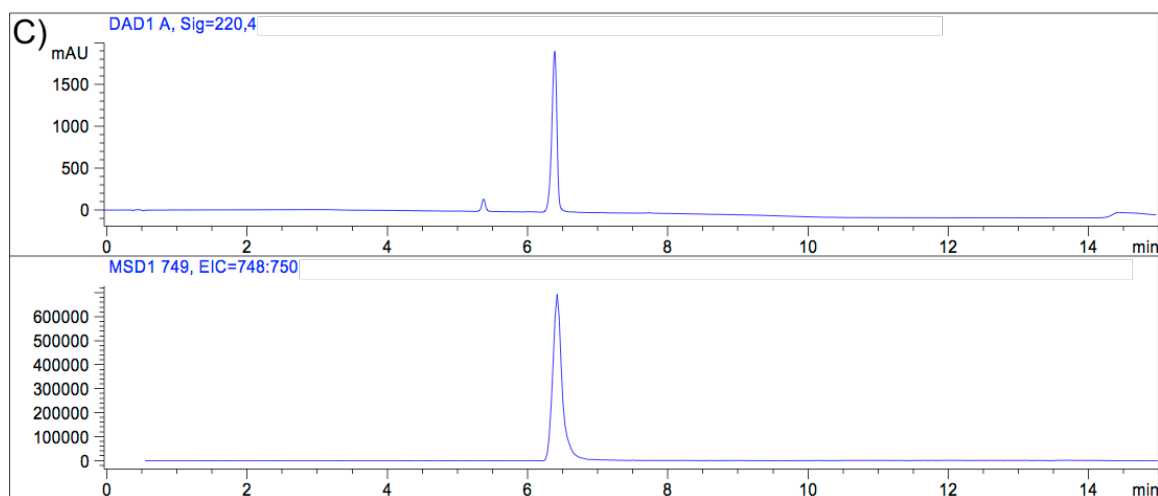

**Figure S4.** LC-MS chromatograms showing UV absorbance (220 nm) and extracted masses for  $[M+H]^+$  ions.

A) ligand **L4**, analytical method J.

B) chelate  $[Gd(L4)]$ , analytical method K.

C) chelate  $[Eu(L4)]$ , analytical method K.

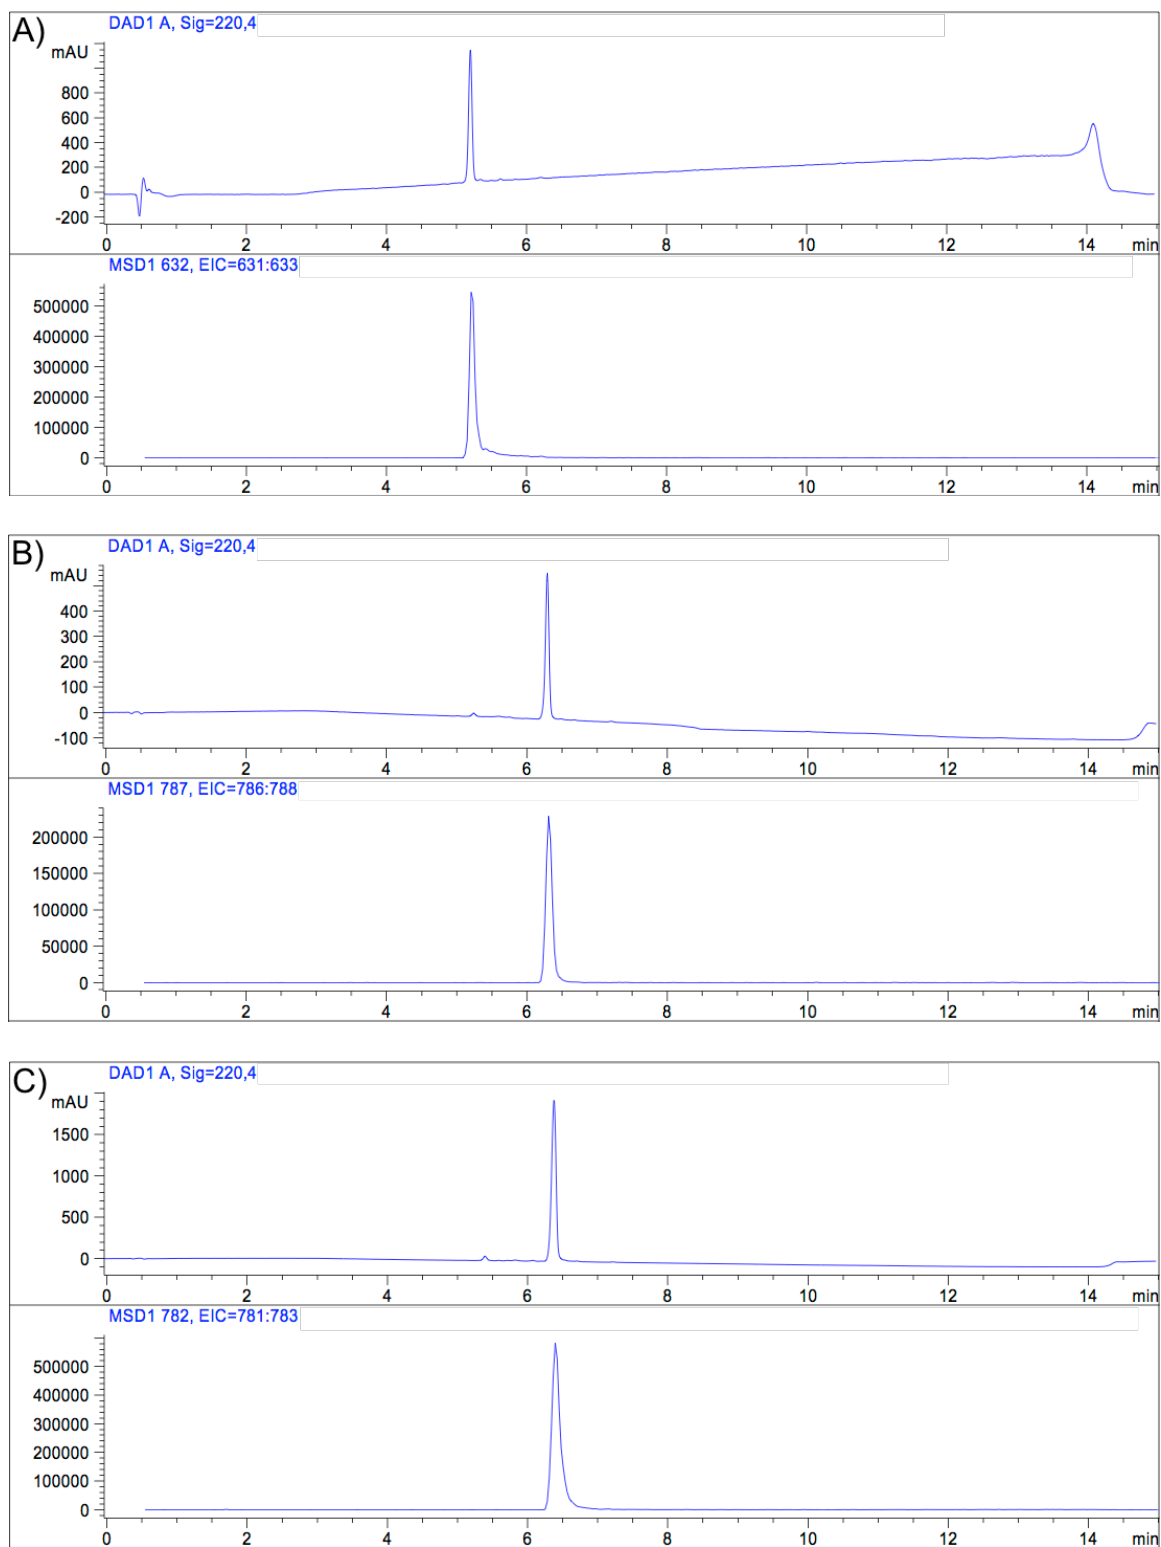

**Figure S5.** LC-MS chromatograms showing UV absorbance (220 nm) and extracted masses for  $[M+H]^+$  ions.

A) ligand **L5**, analytical method J.

B) chelate  $[Gd(L5)]$ , analytical method K.

C) chelate  $[Eu(L5)]$ , analytical method K.

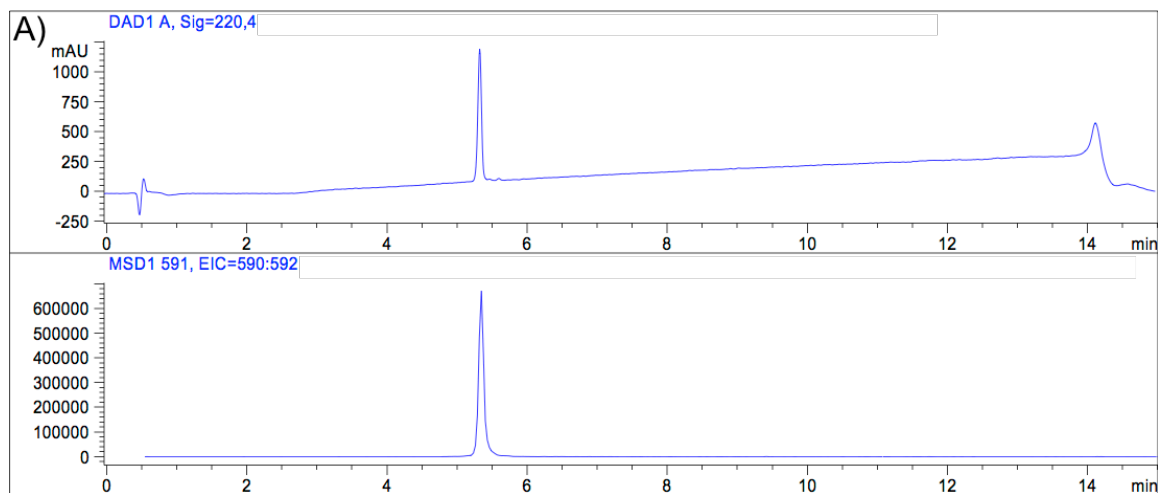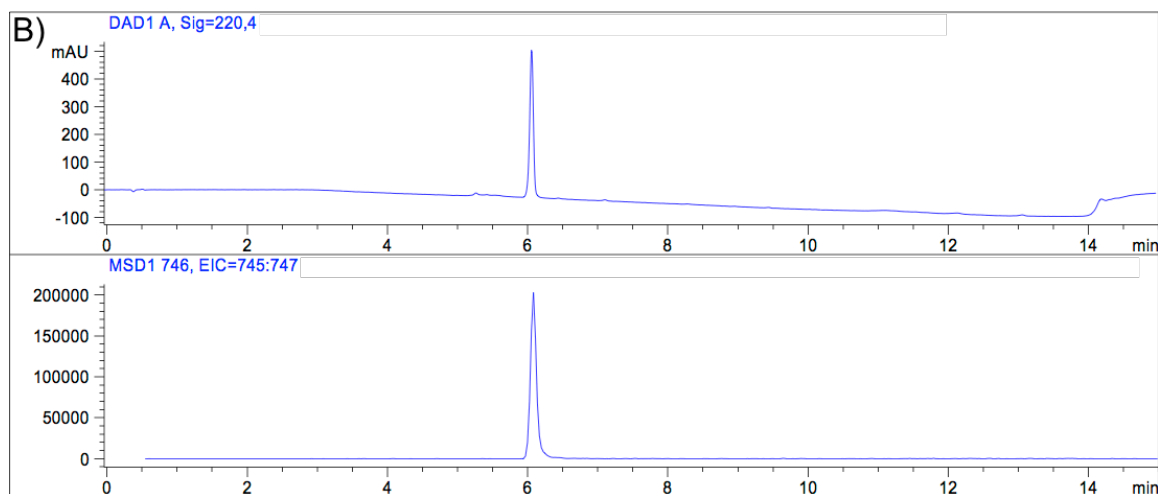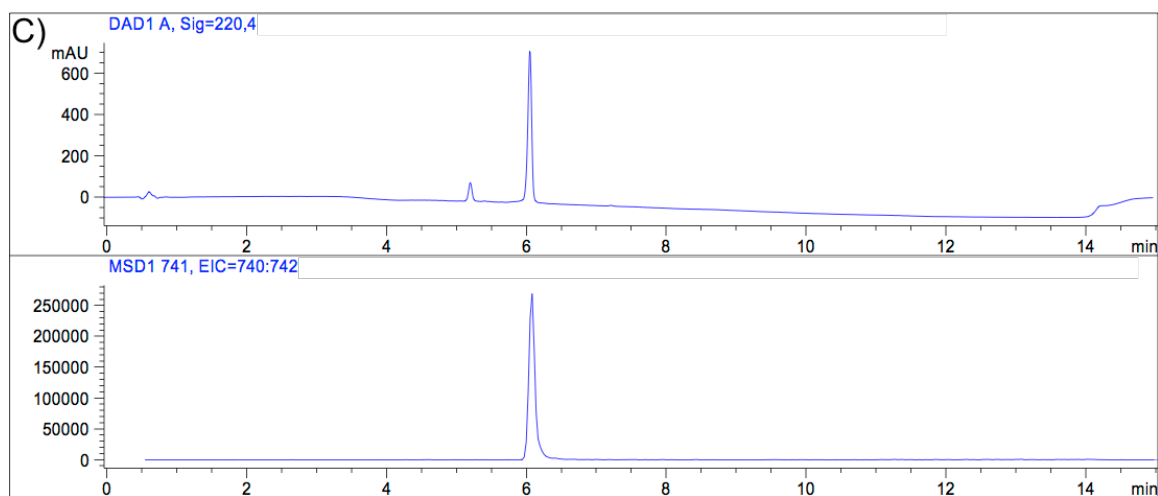

**Figure S6.** LC-MS chromatograms showing UV absorbance (220 nm) and extracted masses for  $[M+H]^+$  ions.

A) ligand **L6**, analytical method J.

B) chelate  $[Gd(L6)]$ , analytical method K.

C) chelate  $[Eu(L6)]$ , analytical method K.



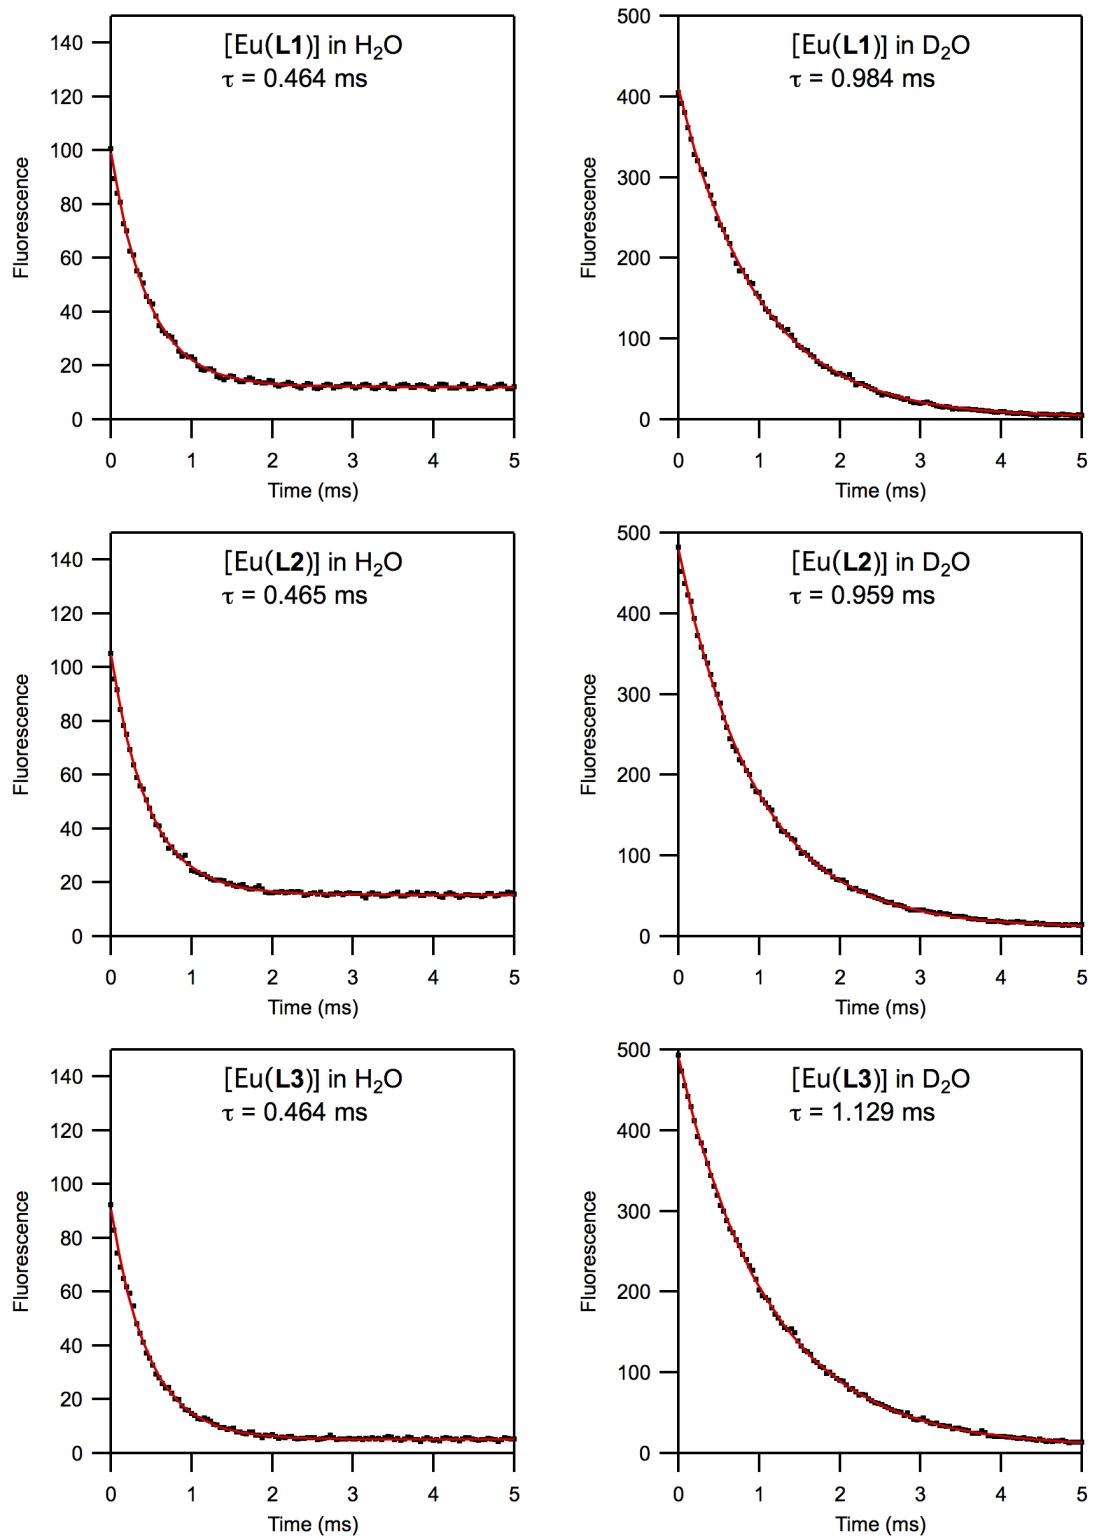

**Figure S7.** Time-dependent luminescence of Eu complexes of ligands L1 – L3 measured in H<sub>2</sub>O and D<sub>2</sub>O. Solid line represents monoexponential fit of the data.

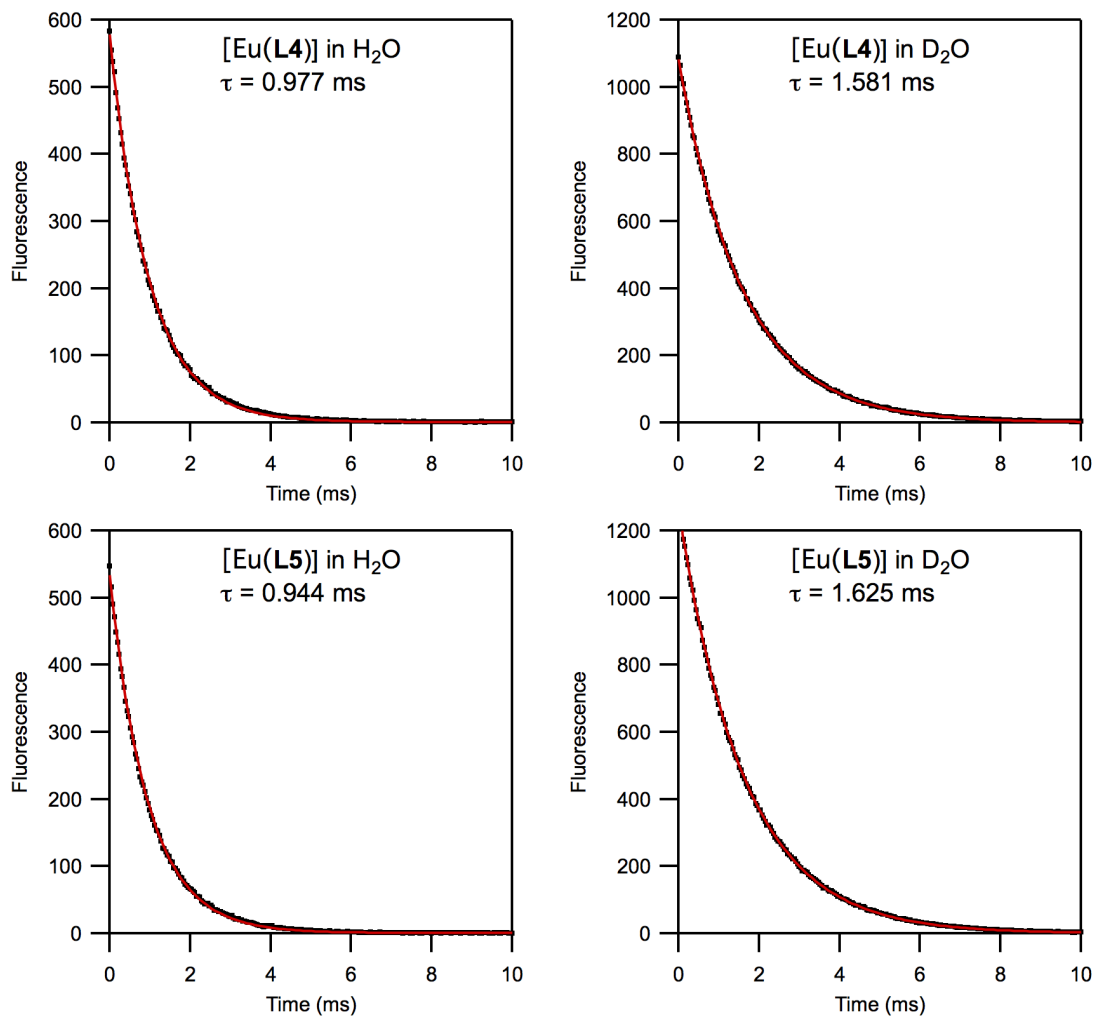

**Figure S8.** Time-dependent luminescence of Eu complexes of ligands **L4** and **L5** measured in H<sub>2</sub>O and D<sub>2</sub>O. Solid line represents monoexponential fit of the data.

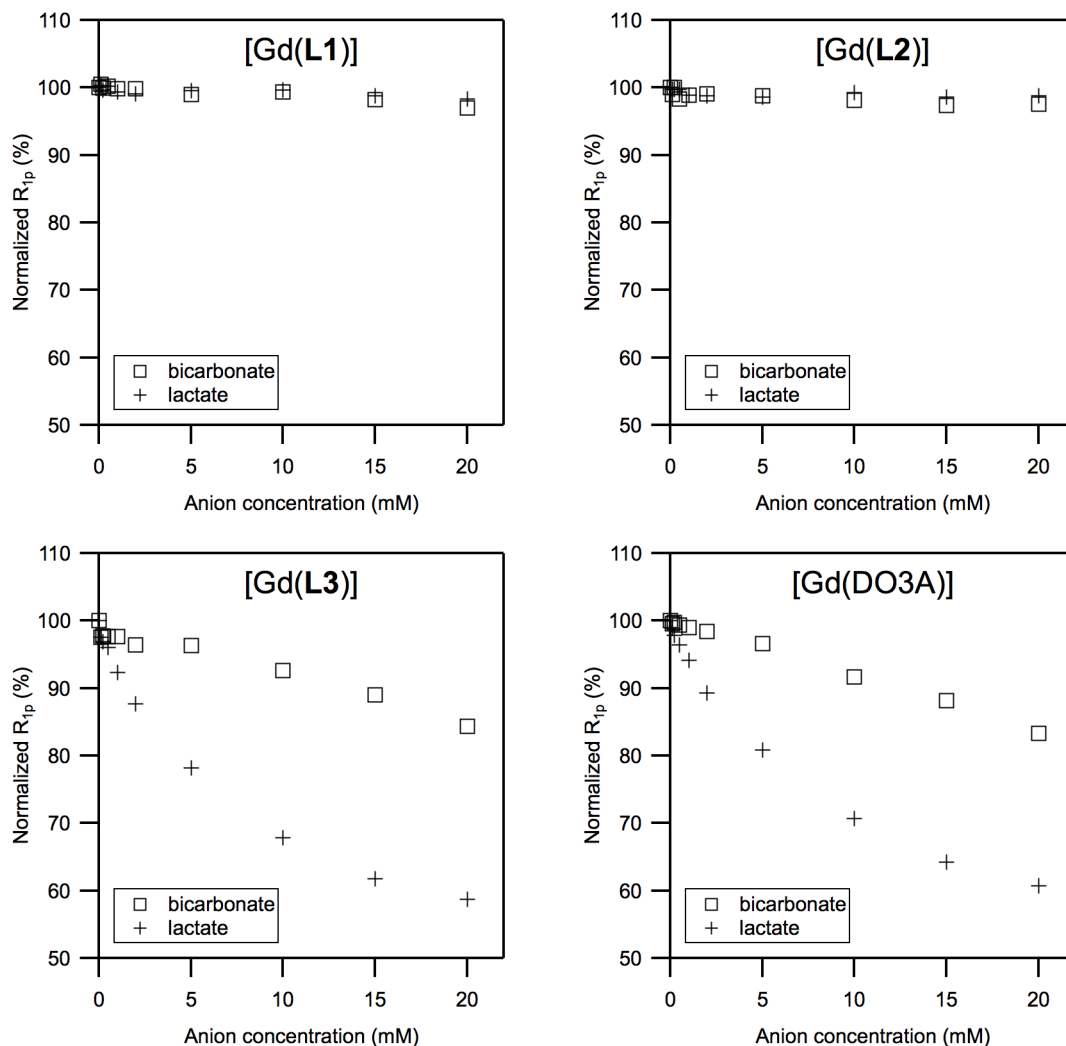

**Figure S9.** Relative change in relaxation rates of 1 mM solutions of gadolinium complexes in 50 mM HEPES buffer pH = 7.4 as a function of added bicarbonate or lactate.

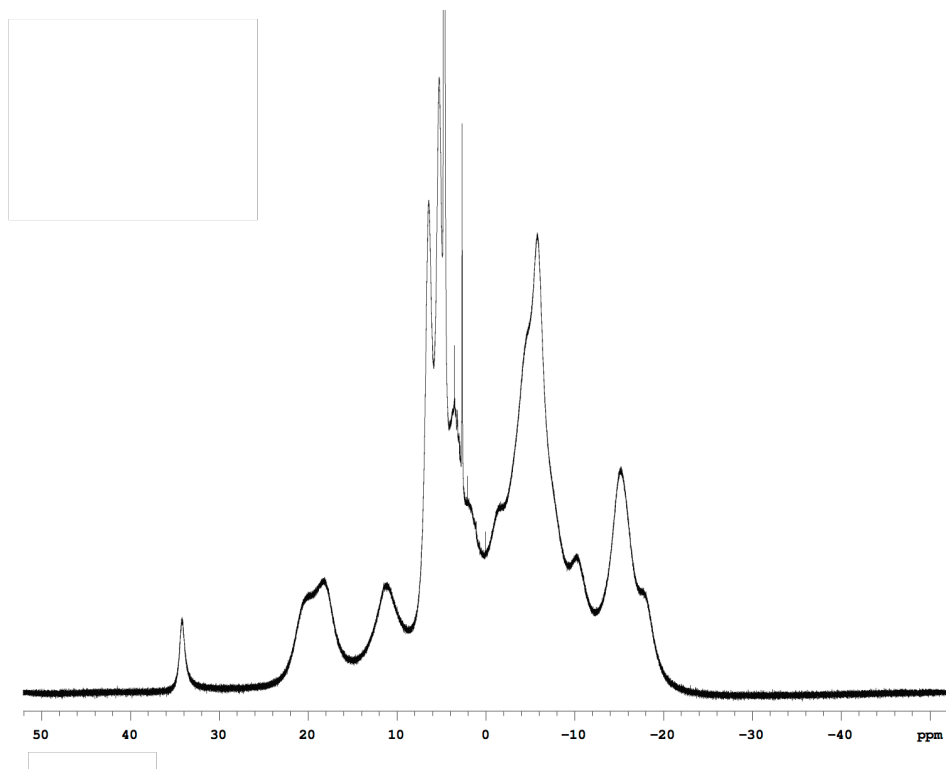

**Figure S10.** <sup>1</sup>H NMR spectrum of [Eu(L1)] in D<sub>2</sub>O at 25 °C.

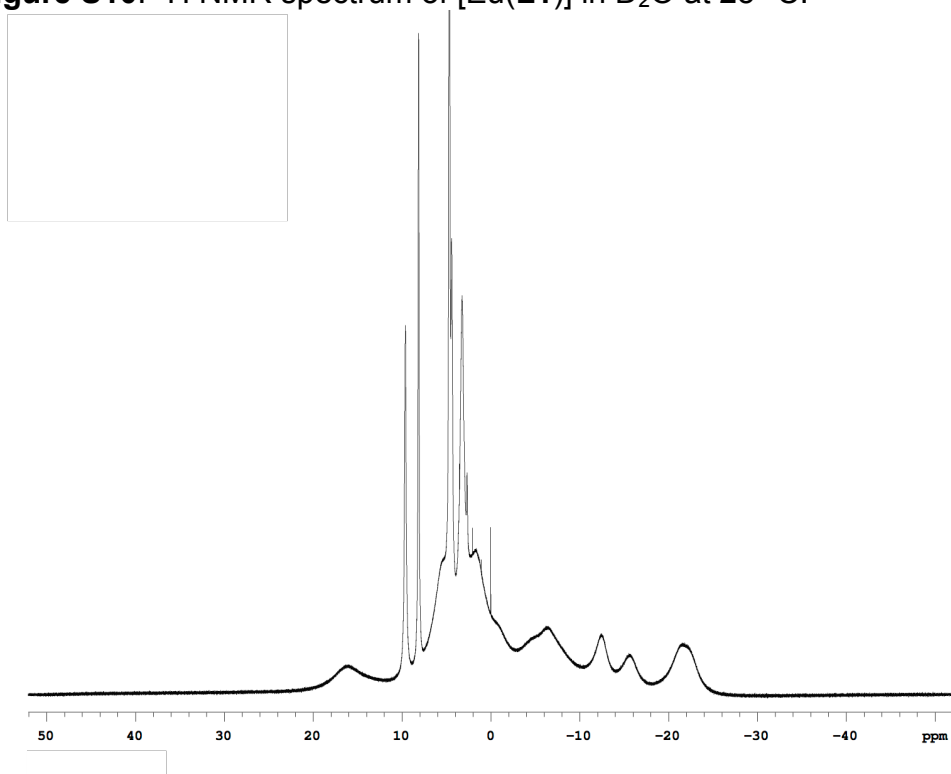

**Figure S11.** <sup>1</sup>H NMR spectra of [Eu(L2)] in D<sub>2</sub>O at 25 °C.

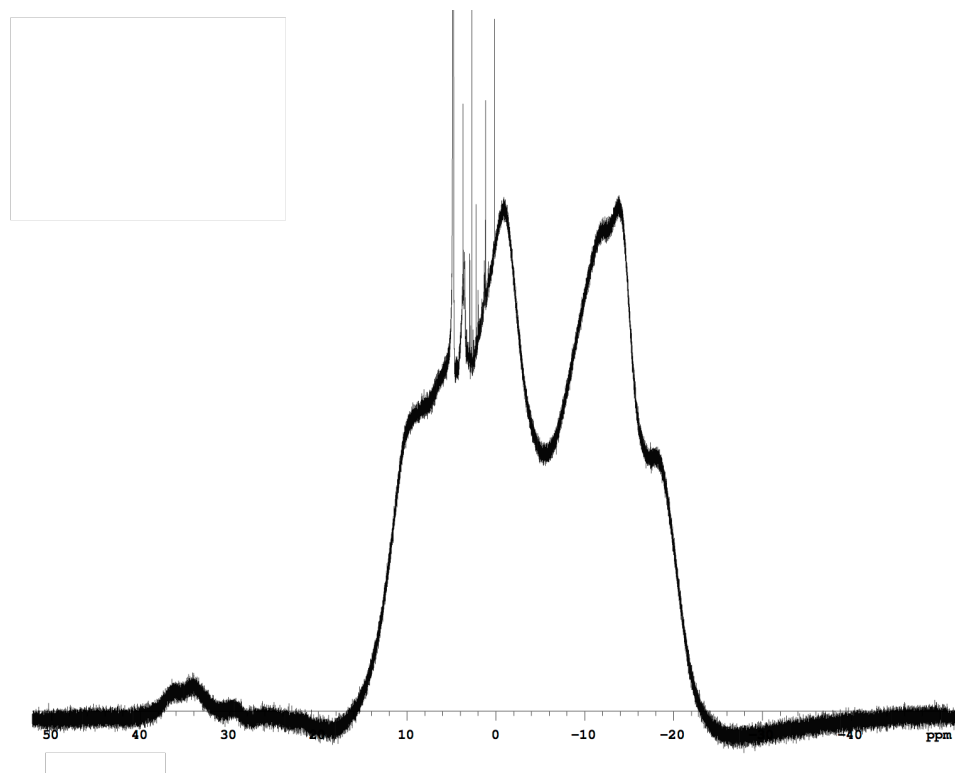

**Figure S12.**  $^1\text{H}$  NMR spectra of  $[\text{Eu}(\text{L3})]$  in  $\text{D}_2\text{O}$  at  $25\text{ }^\circ\text{C}$ .

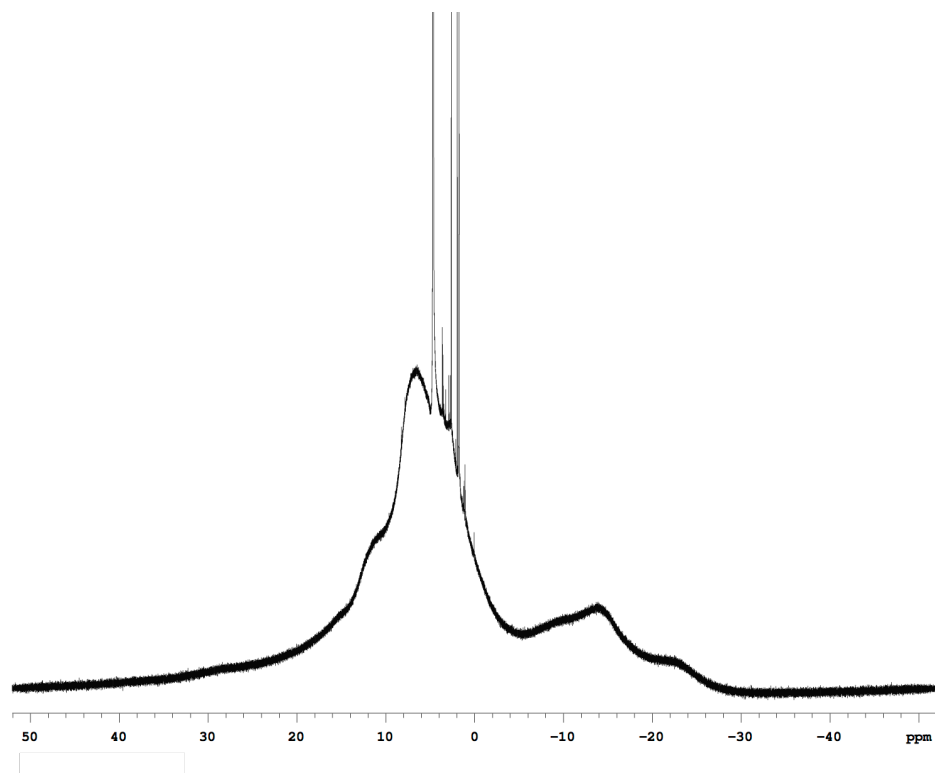

**Figure S13.**  $^1\text{H}$  NMR spectra of  $[\text{Eu}(\text{L4})]$  in  $\text{D}_2\text{O}$  at  $25\text{ }^\circ\text{C}$ .

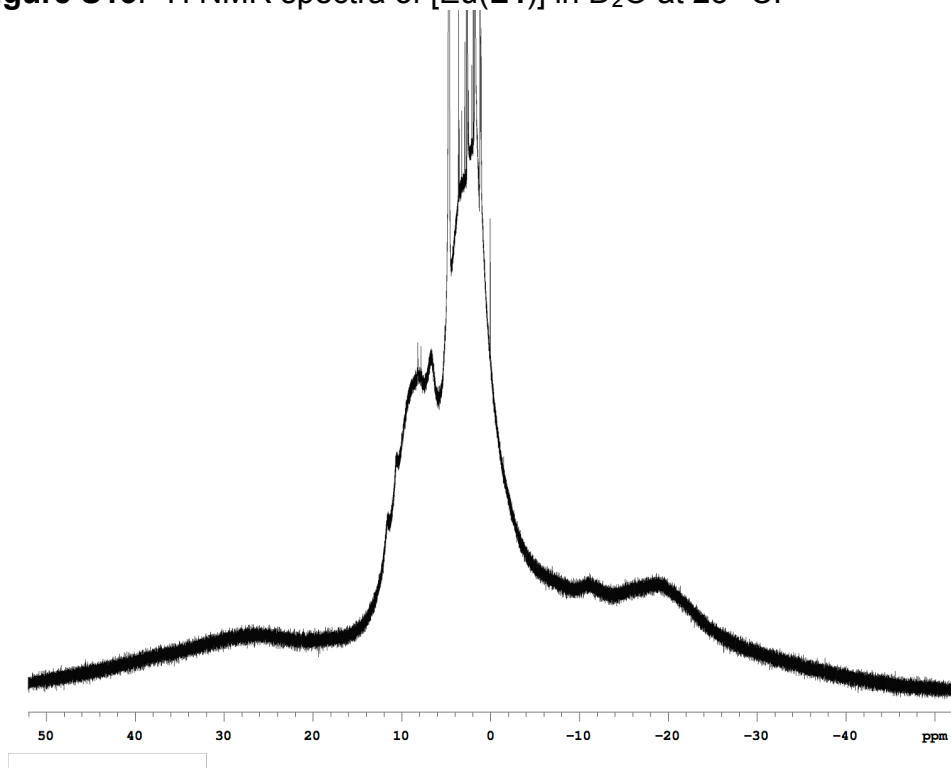

**Figure S14.**  $^1\text{H}$  NMR spectra of  $[\text{Eu}(\text{L5})]$  in  $\text{D}_2\text{O}$  at  $25\text{ }^\circ\text{C}$ .

## List of HPLC methods:

### Preparative:

(A) Preparative column Kromasil C18 20 x 250 mm, solvent A = H<sub>2</sub>O + 0.1% TFA, solvent B = MeCN + 0.1% TFA. Gradient (% B): 5 for 2 min., 5 – 20 in 1 min., 20 – 80 in 12 min., 80 – 100 in 1 min., 100 for 4 min., 100 – 5 in 1 min., 5 for 4 min. Flow rate 20 mL/min. Detection at 220 nm.

(B) Preparative column Phenomenex Luna C5 20 x 250 mm, solvent A = H<sub>2</sub>O + 0.1% TFA, solvent B = MeCN + 0.1% TFA. Gradient (% B): 5 for 2 min., 5 – 40 in 1 min., 40 – 80 in 12 min., 80 – 100 in 1 min., 100 for 4 min., 100 – 5 in 1 min., 5 for 4 min. Flow rate 20 mL/min. Detection at 220 nm.

(C) Preparative column Kromasil C18 20 x 250 mm, solvent A = H<sub>2</sub>O + 0.1% TFA, solvent B = MeCN + 0.1% TFA. Gradient (% B): 5 for 1 min., 5 – 50 in 1 min., 50 – 80 in 8 min., 80 – 100 in 0.5 min., 100 for 1.5 min., 100 – 5 in 1 min., 5 for 4 min. Flow rate 20 mL/min. Detection at 220 nm.

(D) Same as (A) except for the main gradient being 30 – 60 in 12 min.

(E) Preparative column Kromasil C18 20 x 250 mm, solvent A = H<sub>2</sub>O + 0.1% TFA, solvent B = MeCN + 0.1% TFA. Gradient (% B): 5 for 1 min., 5 – 50 in 1 min., 50 – 80 in 10 min., 80 – 100 in 1 min., 100 for 3 min., 100 – 5 in 0.5 min., 5 for 4.5 min. Flow rate 20 mL/min. Detection at 220 nm.

(F) Preparative column Kromasil C18 20 x 250 mm, isocratic 2% MeCN in H<sub>2</sub>O for 10 min. Flow rate 20 mL/min. Detection at 220 nm.

### Analytical:

(G) Analytical column Kromasil C18 4.6 x 250 mm, solvent A = 10 mM ammonium acetate pH = 7, solvent B = MeCN / 10 mM ammonium acetate (90:10). Isocratic 2% B for 15 min. Flow rate 0.8 mL/min.

(H) Analytical column Restek C18 Ultraaqueous 4.6 x 250 mm, solvent A = H<sub>2</sub>O + 0.1% formic acid, solvent B = MeCN + 0.1% formic acid. Isocratic 2% B for 15 min. Flow rate 0.8 mL/min.

(I) Same as method G with analytical column Restek C18 Ultraaqueous 4.6 x 250 mm.

(J) Analytical column Luna C8(2) 2 x 100 mm, solvent A = H<sub>2</sub>O + 0.1% formic acid, solvent B = MeCN + 0.1% formic acid. Gradient (% B): 5 for 2 min., 5 – 95 in 9 min., 95 for 1 min., 95 – 5 in 0.5 min., 5 for 2.5 min. Flow rate 0.8 mL/min.

(K) Analytical column Luna C8(2) 2 x 100 mm, solvent A = 10 mM ammonium acetate pH = 7, solvent B = MeCN / 10 mM ammonium acetate (90:10). Gradient (% B): 5 for 2 min., 5 – 95 in 9 min., 95 for 1 min., 95 – 5 in 0.5 min., 5 for 2.5 min. Flow rate 0.8 mL/min.
